# Supplementary material for: Corticostriatal dynamics encode the refinement of specific behavioral variability during skill learning
Source: eLife journal article supplement (doi:10.7554/elife.09423), 2015-09-29
Supplement: supp [file elife-09423-supp-v1.zip]

Archive with 7 entries (7 files):
- elife_poa_e09423_Figure_6_figure_supplement_1.pdf
- elife_poa_e09423_Video_1.mp4
- elife_poa_e09423_Figure_2_figure_supplement_1.pdf
- elife_poa_e09423_Figure_1_figure_supplement_1.pdf
- elife_poa_e09423_Figure_7_figure_supplement_1.pdf
- elife_poa_e09423_Figure_6_figure_supplement_2.pdf
- elife_poa_e09423_Figure_4_figure_supplement_1.pdf
