# Supplementary figures and images for: Corticostriatal dynamics encode the refinement of specific behavioral variability during skill learning
Source: eLife journal article supplement (doi:10.7554/elife.09423), 2015-09-29

Darkers colors  
representing  
later sessions

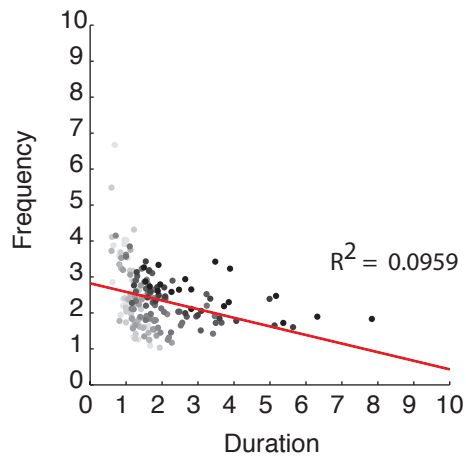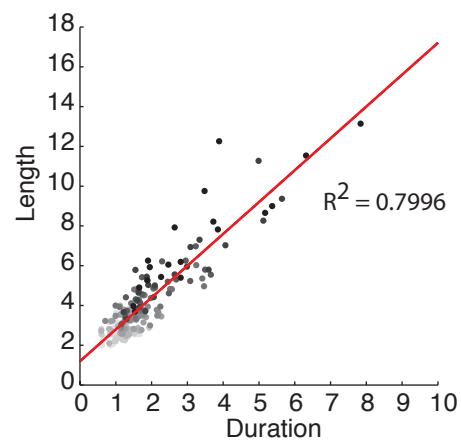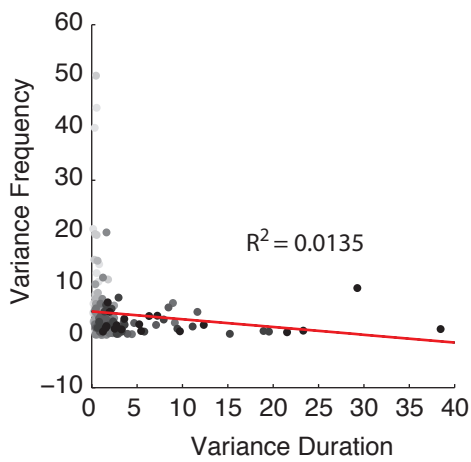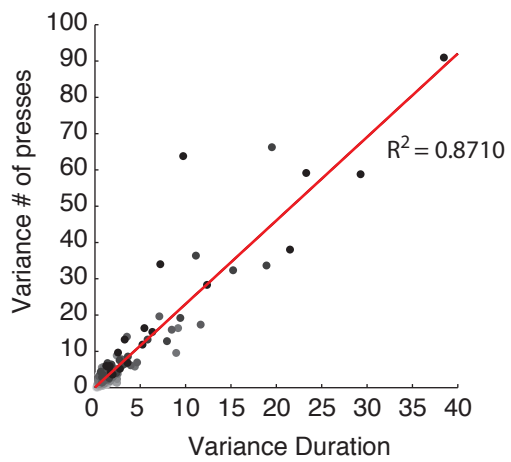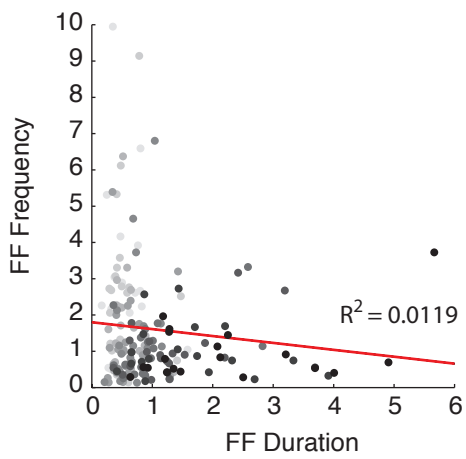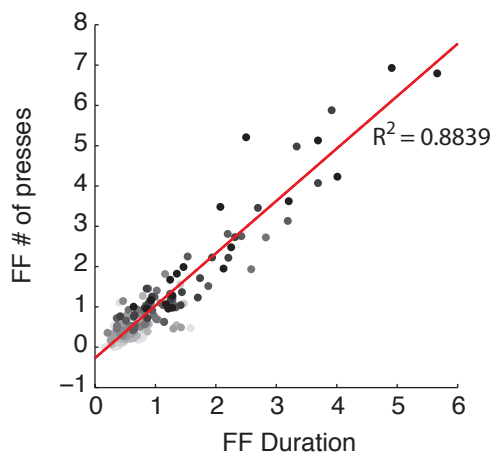

Supplement: supp [file elife-09423-supp-v1.zip]

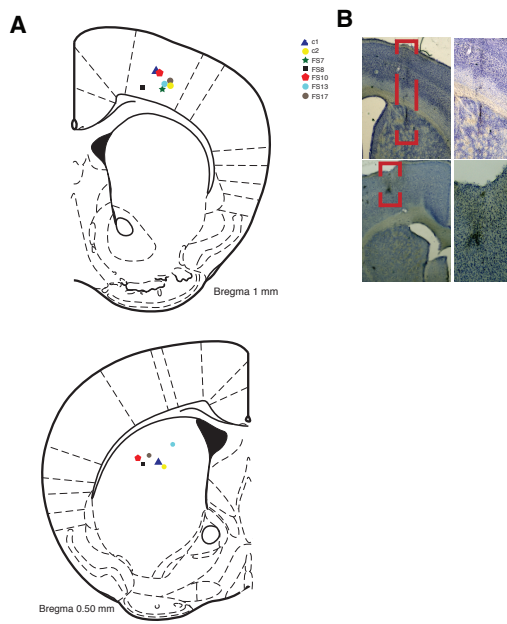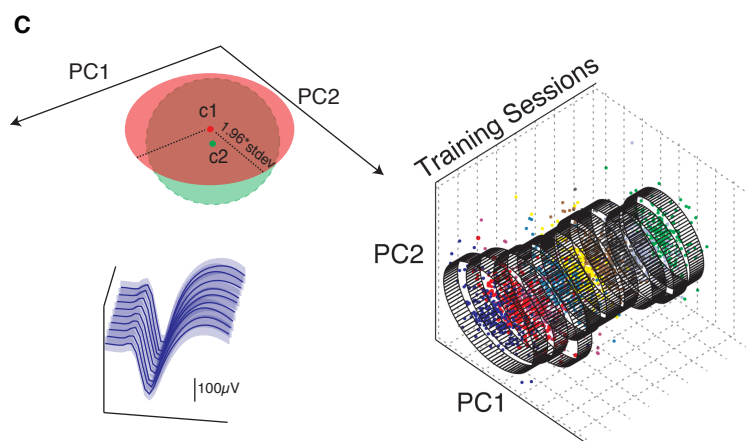

Supplement: supp [file elife-09423-supp-v1.zip]

**A**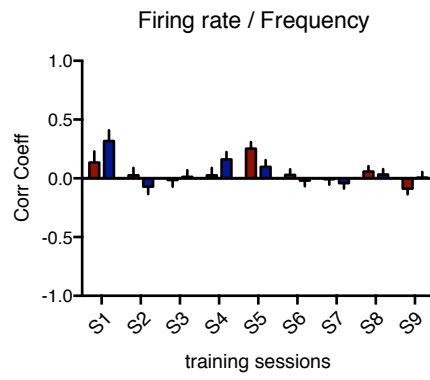**B**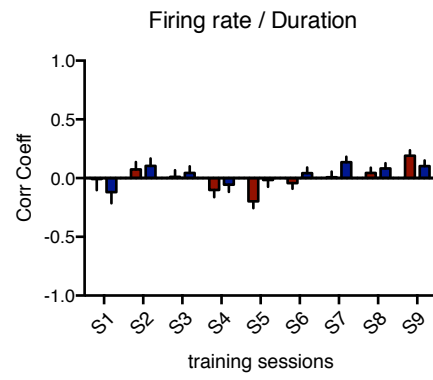

■ DS ■ M1

Supplement: supp [file elife-09423-supp-v1.zip › elife_poa_e09423_Figure_6_figure_supplement_1.pdf]

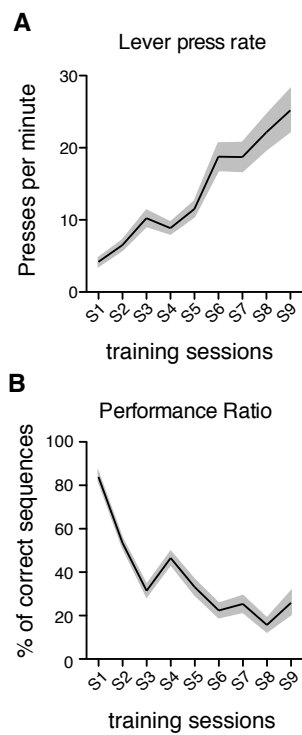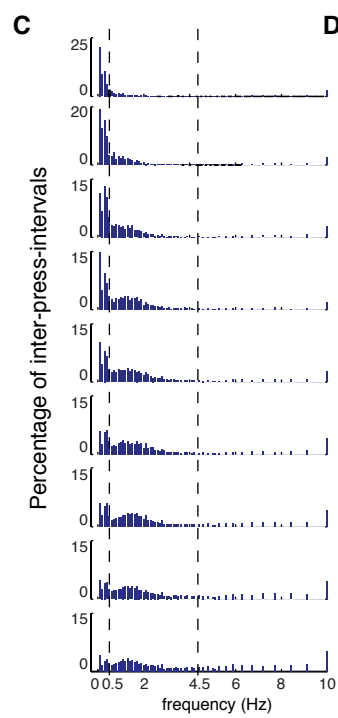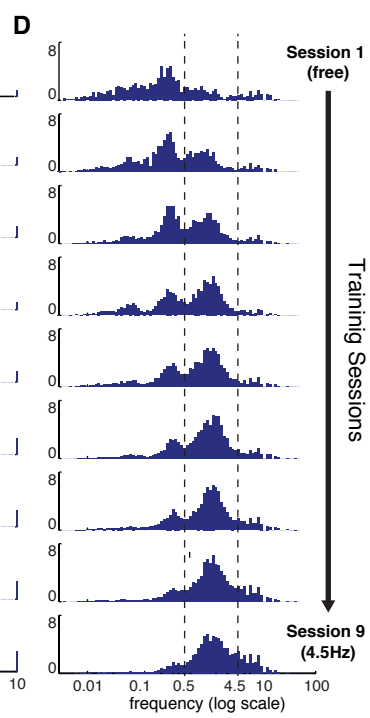

Supplement: supp [file elife-09423-supp-v1.zip › elife_poa_e09423_Figure_1_figure_supplement_1.pdf]

Bootstrapping  
100.000 repetitions

— Sample mean  
— 5% CI  
— H0 mean

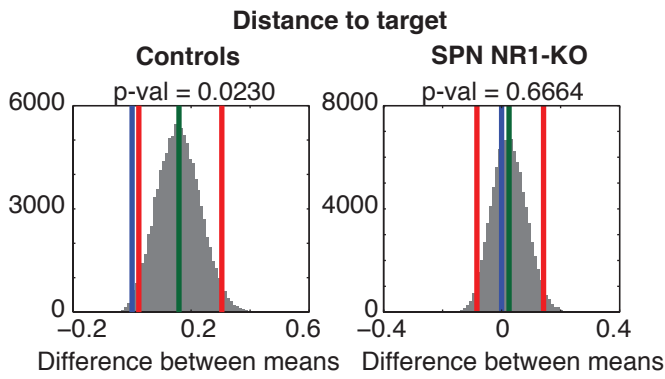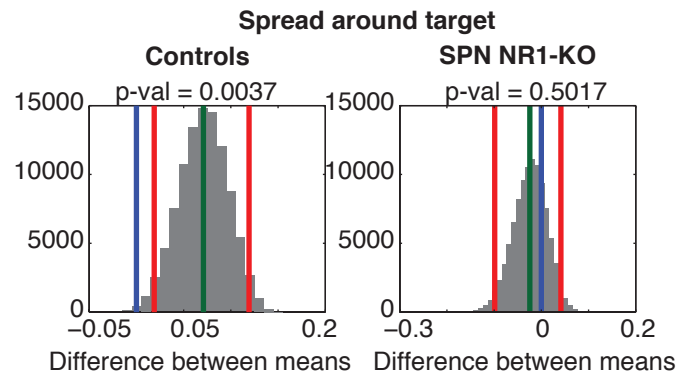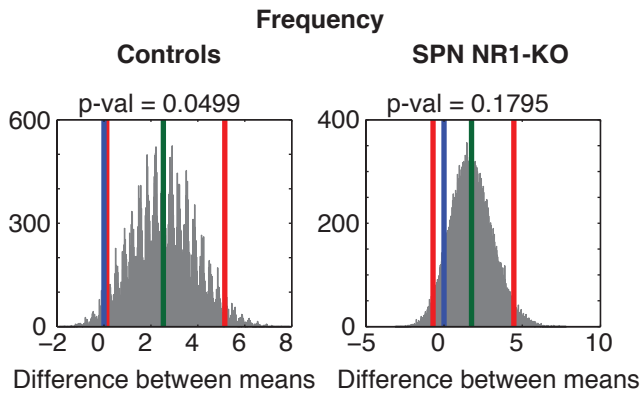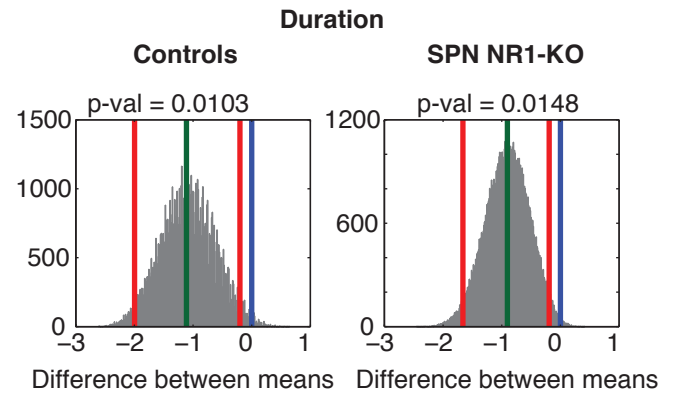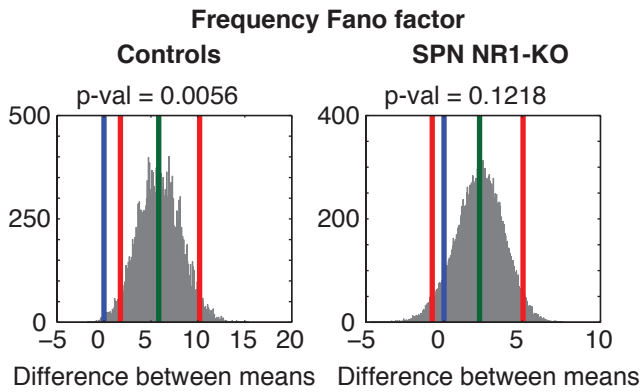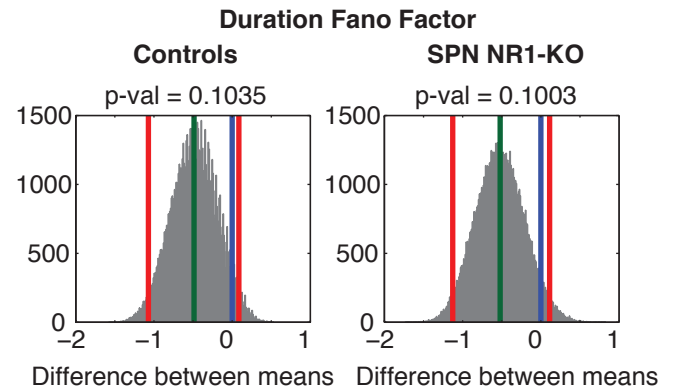

Supplement: supp [file elife-09423-supp-v1.zip › elife_poa_e09423_Figure_7_figure_supplement_1.pdf]

**A**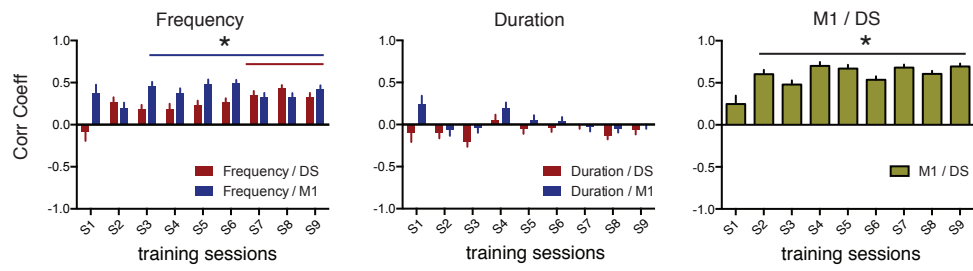**B**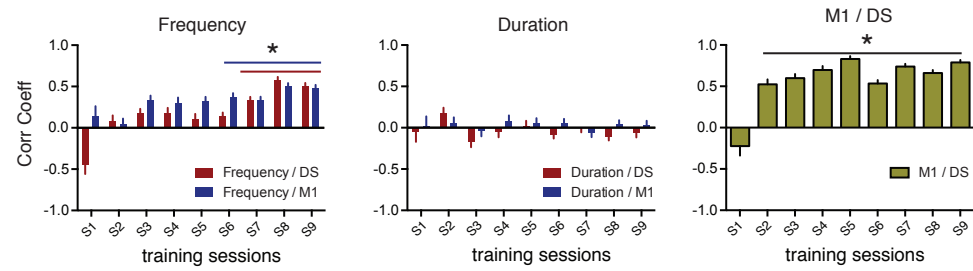

Supplement: supp [file elife-09423-supp-v1.zip › elife_poa_e09423_Figure_6_figure_supplement_2.pdf]
